# Supplementary material
Source: Springer Nature journal article supplement (https://www.springermedizin.de/resource/supplementary/12879_2010_1276_MOESM3_ESM.pdf/9442242)
Supplement: MOESM3 [file 9442242]

### Additional file 3 - Three measures for geographical risk status

To measure geographical risk status by state as of May 27 2009, we used: (1) cumulative H1N1 cases in the state; (2) cumulative H1N1 cases per million population; and (3) a dichotomous variable to indicate if one or more deaths were reported in the state. (1), (2) and the cumulative number of deaths are shown in Table A2.

Table A2: Three measures for geographical risk status, by state, as of May 27 2009.

| State            | Cumulative cases* | Cumulative cases per million population*† | Cumulative number of deaths* |
|------------------|-------------------|-------------------------------------------|------------------------------|
| Alabama          | 67                | 14                                        | 0                            |
| Alaska           | 0                 | 0                                         | 0                            |
| Arizona          | 532               | 82                                        | 3                            |
| Arkansas         | 12                | 4                                         | 0                            |
| California       | 553               | 15                                        | 0                            |
| Colorado         | 68                | 14                                        | 0                            |
| Connecticut      | 102               | 29                                        | 0                            |
| Delaware         | 108               | 124                                       | 0                            |
| Washington, D.C. | 14                | 24                                        | 0                            |
| Florida          | 139               | 8                                         | 0                            |
| Georgia          | 28                | 3                                         | 0                            |
| Hawaii           | 44                | 34                                        | 0                            |
| Idaho            | 11                | 7                                         | 0                            |
| Illinois         | 927               | 72                                        | 0                            |
| Indiana          | 120               | 19                                        | 0                            |
| Iowa             | 71                | 24                                        | 0                            |
| Kansas           | 34                | 12                                        | 0                            |
| Kentucky         | 38                | 9                                         | 0                            |
| Louisiana        | 86                | 19                                        | 0                            |
| Maine            | 9                 | 7                                         | 0                            |
| Maryland         | 44                | 8                                         | 0                            |
| Massachusetts    | 286               | 44                                        | 0                            |
| Michigan         | 178               | 18                                        | 0                            |
| Minnesota        | 44                | 8                                         | 0                            |
| Mississippi      | 8                 | 3                                         | 0                            |
| Missouri         | 24                | 4                                         | 1                            |
| Montana          | 12                | 12                                        | 0                            |
| Nebraska         | 35                | 20                                        | 0                            |
| Nevada           | 50                | 19                                        | 0                            |

|                |      |     |   |
|----------------|------|-----|---|
| New Hampshire  | 27   | 21  | 0 |
| New Jersey     | 29   | 3   | 0 |
| New Mexico     | 97   | 49  | 0 |
| New York       | 456  | 23  | 2 |
| North Carolina | 13   | 1   | 0 |
| North Dakota   | 6    | 9   | 0 |
| Ohio           | 15   | 1   | 0 |
| Oklahoma       | 64   | 18  | 0 |
| Oregon         | 120  | 32  | 0 |
| Pennsylvania   | 95   | 8   | 0 |
| Rhode Island   | 11   | 10  | 0 |
| South Carolina | 39   | 9   | 0 |
| South Dakota   | 4    | 5   | 0 |
| Tennessee      | 95   | 15  | 0 |
| Texas          | 1358 | 56  | 3 |
| Utah           | 122  | 45  | 1 |
| Vermont        | 2    | 3   | 0 |
| Virginia       | 25   | 3   | 0 |
| Washington     | 575  | 88  | 1 |
| West Virginia  | 0    | 0   | 0 |
| Wisconsin      | 1130 | 201 | 0 |
| Wyoming        | 0    | 0   | 0 |

---

Source: \* CDC (2009) [1], †United States Census [2].

## References

[1] Centers for Disease Control and Prevention, 2009 H1N1 Flu

[<http://www.cdc.gov/h1n1flu/>]

[2] United States Census [<http://www.census.gov/>]
